# Supplementary material
Source: PubMed Central journal article supplement (PMC5374072)
Supplement: jciinsight-2-91963-s001.pdf [file jciinsight-2-91963-s001.pdf]

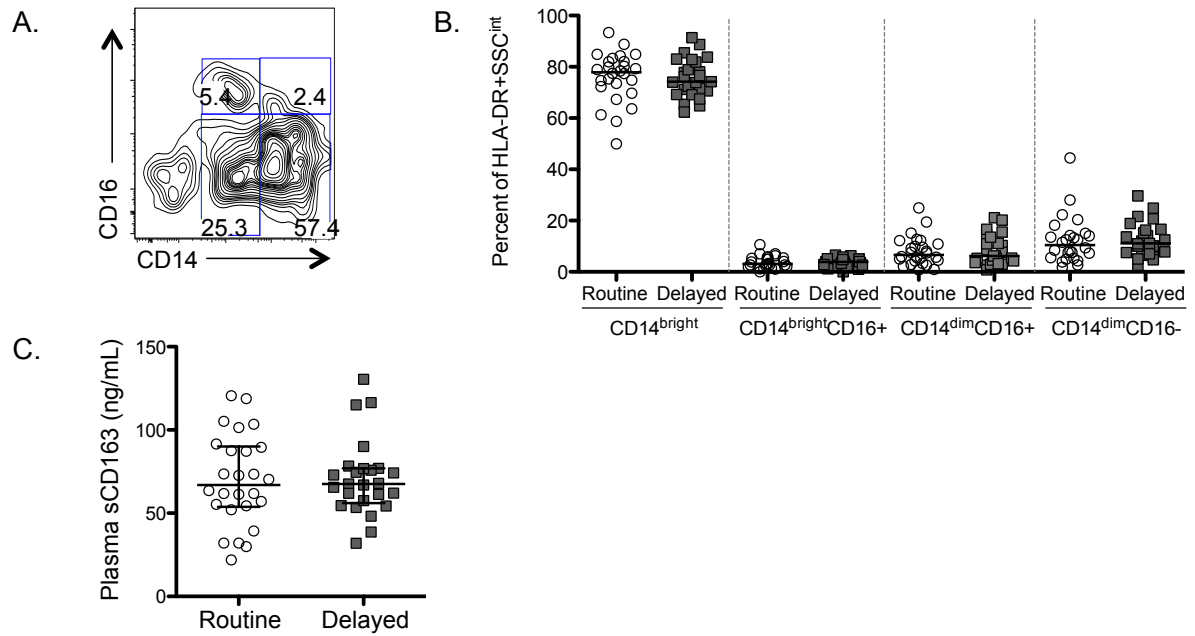

Supplemental figure 1. Lack of differential monocyte activation in routine and delayed BCG-vaccinated HIV-exposed infants at eight weeks of age. Representative flow plot depicting CD14<sup>+</sup> and CD16<sup>+</sup> monocytes of HLA-DR+SSC<sup>mid</sup>CD3<sup>-</sup>CD20<sup>-</sup> PBMC (A). Graph depicting the overall monocyte phenotypic distribution in routine (open circles; N=26) or delayed (shaded squares; N=25) BCG-vaccinated infants at 8 weeks of age (B). Only infants in the 'routine' arm had received vaccination at this point while the 'delayed' arm was unvaccinated. Lines depict the median of each group. (C). Plasma concentration of sCD163 in 8-week old infants that received either routine or delayed BCG vaccination. Lines depict the median of each group while the whiskers depict the interquartile ranges. Statistics were performed using a Mann-Whitney test for non-parametric data.

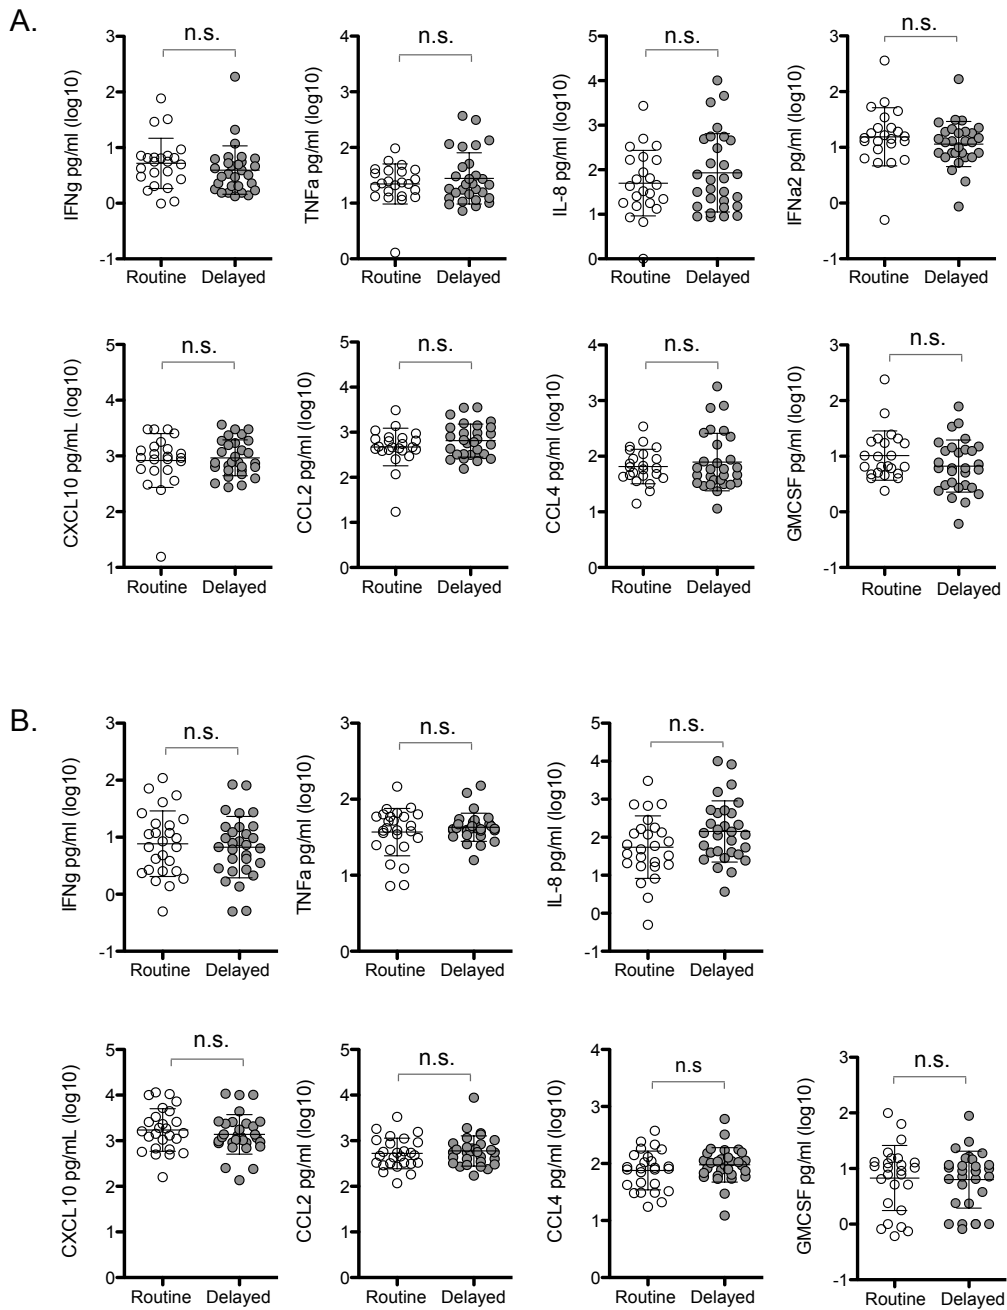

Supplemental Figure 2. Plasma cytokine concentrations in 2 and 6 week old HIV-exposed infants randomized to receive routine or delayed BCG vaccination. Levels of IFN- $\gamma$  TNF- $\alpha$ , IL-8, IFN- $\alpha$ 2, IP-10 (CXCL10), MCP1 (CCL2), MIP-1 $\alpha$  (CCL4), and GMCSF were assessed in 2-week (A; N=27 for routine and N=31 for delayed) or 6-week (B; N=31 for both groups) infants following routine or delayed BCG vaccination. Only infants in the 'routine' arm received vaccination at these points while the 'delayed' arm was unvaccinated. All values are log<sub>10</sub> transformed. Lines depict the mean of each group, and the whiskers represent the standard deviation. Statistics were performed using a two-tailed student's t-test.

| <b>Gene Symbol</b> | <b>Assay ID</b> |
|--------------------|-----------------|
| ARG1               | Hs00968979_m1   |
| CCL2               | Hs00234140_m1   |
| CCL5               | Hs00174575_m1   |
| CCR2               | Hs00704702_s1   |
| CD14               | Hs02621496_s1   |
| CD209 (DC-SIGN)    | Hs01588349_m1   |
| CD86               | Hs01567026_m1   |
| CD8A               | Hs00233520_m1   |
| CIITA              | Hs00172094_m1   |
| CLEC4F             | Hs00403246_m1   |
| CSF1R              | Hs00911250_m1   |
| CX3CR1             | Hs01922583_s1   |
| CXCL10             | Hs01124252_g1   |
| CXCL13             | Hs00757930_m1   |
| CXCL9              | Hs00171065_m1   |
| CXCR3              | Hs01847760_s1   |
| EMR1               | Hs00173562_m1   |
| FCGR3A/B (CD16)    | Hs00275547_m1   |
| GAPDH              | Hs02758991_g1   |
| HPRT1              | Hs02800695_m1   |
| IDO1               | Hs00984148_m1   |
| IFNA1              | Hs00855471_g1   |
| IFNAR2             | Hs01022060_m1   |
| IFNB1              | Hs01077958_s1   |
| IFNG               | Hs00989291_m1   |
| IL10               | Hs00961622_m1   |
| IL12A              | Hs01073447_m1   |
| IL12B              | Hs01011518_m1   |
| IL12RB1            | Hs00538167_m1   |
| IL18               | Hs01038788_m1   |
| IL18BP             | Hs00271720_m1   |
| IL1A               | Hs00174092_m1   |
| IL1B               | Hs00174097_m1   |
| IL23A              | Hs00900828_g1   |
| IL6                | Hs00985639_m1   |
| IRF4               | Hs01056533_m1   |
| ITGAM              | Hs00355885_m1   |
| ITGAX              | Hs00174217_m1   |

|                 |               |
|-----------------|---------------|
| KLF4            | Hs00358836_m1 |
| MARCO           | Hs00198935_m1 |
| NOS2            | Hs01075529_m1 |
| PTGS2           | Hs00153133_m1 |
| SOCS2           | Hs00919620_m1 |
| SOCS3           | Hs02330328_s1 |
| TNF             | Hs01113624_g1 |
| TNFSF9          | Hs00169409_m1 |
| TNFSF10 (TRAIL) | Hs00921974_m1 |

Supplemental Table 1: List of Applied Biosystems TaqMan primer-probe assays used in the study.

| <b>Adverse Events</b>             | <b>Routine<br/>(N=78)</b> | <b>Delayed<br/>(N=71)</b> | <b>p-value</b> |
|-----------------------------------|---------------------------|---------------------------|----------------|
| <b>Serious Adverse Events</b>     | <b>9</b>                  | <b>3</b>                  | <b>0.14</b>    |
| Death                             | 3                         | 0                         |                |
| HIV infection                     | 4                         | 1                         |                |
| Bacterial meningitis              | 1                         | 1                         |                |
| Pneumonia                         | 1                         | 1                         |                |
| <b>Upper respiratory tract</b>    | <b>14</b>                 | <b>6</b>                  | <b>0.10</b>    |
| Any symptoms                      | 1                         | 0                         |                |
| Runny nose                        | 2                         | 2                         |                |
| Blocked nostrils                  | 11                        | 4                         |                |
| <b>Lower respiratory tract</b>    | <b>15</b>                 | <b>15</b>                 | <b>0.84</b>    |
| Cough                             | 15                        | 9                         |                |
| Chest infection                   | 0                         | 3                         |                |
| Wheeze                            | 0                         | 3                         |                |
| <b>Constitutional</b>             | <b>6</b>                  | <b>7</b>                  | <b>0.77</b>    |
| Fever                             | 6                         | 6                         |                |
| Jaundice                          | 0                         | 1                         |                |
| <b>Dermatological</b>             | <b>21</b>                 | <b>21</b>                 | <b>0.86</b>    |
| Eczema                            | 0                         | 2                         |                |
| Rash (other)                      | 10                        | 9                         |                |
| Rash (diaper)                     | 5                         | 7                         |                |
| Pustules on body                  | 2                         | 2                         |                |
| Ringworm                          | 2                         | 0                         |                |
| Erythema                          | 0                         | 1                         |                |
| Irritated/dry skin                | 2                         | 0                         |                |
| <b>Abdominal</b>                  | <b>5</b>                  | <b>7</b>                  | <b>0.55</b>    |
| Vomiting                          | 1                         | 1                         |                |
| Loose stools                      | 1                         | 3                         |                |
| Constipation                      | 3                         | 2                         |                |
| Blood in stool                    | 0                         | 1                         |                |
| <b>Ear, eye, nose, and throat</b> | <b>6</b>                  | <b>4</b>                  | <b>0.75</b>    |
| Coated tongue                     | 1                         | 2                         |                |
| Oral thrush                       | 3                         | 1                         |                |
| Eye infection                     | 1                         | 1                         |                |
| Blocked tear duct                 | 1                         | 0                         |                |
| <b>Other</b>                      | <b>3</b>                  | <b>3</b>                  | <b>1.00</b>    |
| Swollen scrotum                   | 0                         | 1                         |                |
| Abscess (face)                    | 0                         | 1                         |                |
| Splenomegaly                      | 1                         | 1                         |                |
| Influenza                         | 1                         | 0                         |                |
| Non-use of right arm              | 1                         | 0                         |                |
| <b>TOTAL</b>                      | <b>79</b>                 | <b>66</b>                 |                |

Supplemental Table 2: Adverse events by randomization arm.
